# Supplementary material for: MiR-195 and Its Target SEMA6D Regulate Chemoresponse in Breast Cancer
Source: Cancers (Basel). 2021 Nov 28;13(23):5979. doi: 10.3390/cancers13235979 (PMC8656586; doi:10.3390/cancers13235979)
Supplement: Supplementary file 1 [file cancers-13-05979-s001.zip › Table S3.xlsx]

## Sheet: Sheet1
starBase predicted targets of miR-195		starBase predicted targets of miR-26b		pulldown identified targets of miR-195		pulldown identified targets of miR-26b
E2F7		PRKCD		CCL26		SNX29P1
EIF2C1		PTER		SIRT4		AL592114.3
LUZP1		TANC2		AC009093		DDO
AKT3		ATAD2B		C12orf60		SEPT7-AS1
CCND2		NTN4		VIM		ADM5
CPEB3		ACBD5		SLURP1		SPATA6L
QKI		WNT5A		STX17-AS1		CCDC88A
MTMR4		SSH2		TNNI1		LINC02482
CPEB2		ULK1		AP003119		TMEM156
HELZ		RTF1		PTGS1		TMC8
RAB11FIP2		GSK3B		CPXM2		PIFO
SLC4A7		BAZ2B		SYT3		DNAH17-AS1
YWHAQ		STK39		FAM229A		SYNC
PLAG1		ITGA5		FAM57B		KRT32
MAP7		PSD3		AC053503		C12orf60
BTRC		BLOC1S2		TMC8		CACYBPP1
PURA		PAPD4		SEC14L4		PEG13
CDS2		FBXO11		TIGD4		BHMT
WAPAL		CTTNBP2NL		AC104819		AC141930.1
FBXW7		PDHX		AKR7A3		PCNPP1
TMCC1		CCDC6		PQLC2L		AL512274.1
COPS2		RAP2C		SLC25A48		AP003469.2
KIF21A		JAG1		LINC02482		PIWIL4
SYNJ1		G3BP2		AC126177		AC093909.1
RSBN1				GOLGA8N		AC007639.1
CCND1				AC011472		RNU4-24P
HIGD1A				TUBB2B		RPS15AP11
SEMA6D				IFNLR1		RPL26P35
DDX3X				DUX4L37		BACE1-AS
PTCH1				HOPX		HLA-T
EYA1				SIGLEC15		AC006511.3
CDV3				ADM5		CICP3
CCNE1				LINC00294		AL158211.4
CCDC6				NPIPB3		PDE8B
DMTF1				OSCAR		FAIM2
PPP2R5C				RNU5E-4P		MIR548E
RUNX1T1				CCNT2-AS1		MACROD2-IT1
HDGF				FAM225B		AC146507.1
BCL2				SLC35E1P1		RN7SL756P
SHOC2				AC009041		AC010632.2
GOLGA1				AL391988		C8G
TMEM55A				BACH2		PRR5L
RASSF5				SFTPD		KLHDC7A
PTHLH				SH3TC2		DNER
PHF19				GOLGA2P8		KRTAP10-2
MYB				ITGB2-AS1		AL121790.2
SRPK1				HCG20		HRH1
WDR47				AC121251		AL034405.1
GNAI3				AC090912		AL513123.1
ZNF532				CTTNBP2		AC012435.1
WWC1				AC009365		AL645608.3
TAF15				AL354751		AL138787.2
SIAH1				AC007326		HIST2H2BA
WNT3A				AL096678		CR391992.1
STK33				INTS6-AS1		AC124067.2
				CRTC3-AS1		SH3TC2
				PDE1A		AL590133.1
				RF00415		MTND4P26
				PROSER2-AS1		RPS12P17
				CDK3		AC067930.3
				AC011468		AC046168.1
				AC124798		AC020978.3
				AC110285		STEAP4
				HTR5BP		DPT
				CLIC2		PIGFP2
				FAM239A		NFIA-AS1
				OR2AF1P		STAG3
				AC004069		AL353706.1
				AL133297		AL078645.2
				SNAI1		RPL7P39
				COL4A2		CCDC13
				AC138969		AP003119.1
				AL109917		AL031667.2
				AC100801		AC147055.1
				PCDHB19P		AC009093.4
				AL353997		SNHG22
				TSPAN12		AL390957.1
				PLSCR4		POU1F1
				ARL10		CDRT15P1
				ZSWIM9		KIF26B
				TRBV20OR9-2		RPL23AP25
				MTND4P15		AC107241.1
				AL391825		AC020891.2
				AC136443		RPS26P39
				SMIM6		LINC01605
				FSBP		MCTP2
				AP001011		CEACAM19
				SOX6		RF00019
				HAR1A		AC007040.1
				EDDM3CP		SUGT1P3
				JMJD7		RNU7-124P
				AC124067		AC124319.1
				AC092747		AC004381.2
				GTF3AP2		AC073648.6
				AC025917		LOH12CR2
				SNX6P1		ASTN2-AS1
				TSPAN11		AL117328.1
				CAP1P2		RNU1-103P
				AL157400		AC009097.1
				PCDHGA12		AC004491.1
				AC009554		DPYSL3
				MINDY4		PRSS35
				SELENOV		MKRN3
				CRYGS		LAGE3P1
				LINC02026		ALG1L10P
				SNORA2C		AC009041.2
				MCIDAS		GIF
				AC009299		NPIPB3
				RPL23AP10		RGMA
				AC098869		S100A3
				AC012435		CCNB2P1
				AC009053		BASP1-AS1
				AC093904		SNORA2C
				AC128688		MIR583HG
				AC004520		AL136301.1
				AC087239		AZGP1P1
				TBX20		AC069257.1
				ARMC4		AL049552.1
				DCAF4L1		AC090197.1
				SLC34A3		AC022973.4
				AL590617		LINC02324
				AF230666		AL137802.2
				SNORD11		AC093635.1
				AC084117		C1orf127
				AC099778		TMEM232
				MIR4482		NAP1L1P3
				TREX2		AC007622.1
				TMEM221		AL589765.7
				TNKS2-AS1		AC011491.3
				AC018442		AC022960.3
				RPL36AP43		HOXA11
				AC027279		THBS4
				AC006030		GRK7
				AC005544		AKAP6
				AC006504		ENO1-AS1
				AC008946		ZNF280B
				AL606834		AC010327.5
				FRG1DP		KCNK10
				FNDC4		CKLF
				ABCC11		PROSER2-AS1
				VEGFD		AL683842.1
				NPTX1		UBE2FP3
				AL162595		SRP14P3
				POTEF		PITPNM2-AS1
				UCA1		AC007938.2
				AC018804		AL691403.2
				LINC01399		GCNT3
				AC010973		TRAV29DV5
				AC016597		AC005091.1
				AC092067		AC008278.2
				AL034374		SH3GL1P2
				AC064801		MIR4263
				AC080080		AL008721.2
				AC105235		AC020604.1
				AC254562		CCDC82
				FOXP3		MEIOB
				CDH15		GRM2
				CLTRN		OR2W6P
				PARM1		TTC9B
				NCBP2L		AL807752.1
				SLC38A3		RN7SL382P
				AC046134		AC026774.1
				PRRT4		AC106795.3
				AC010733		AC124276.2
				ID2-AS1		AC006504.3
				EPN2-AS1		AL645608.9
				FER1L5		AC009041.4
				AC027018		CPXM2
				AC020891		DGLUCY
				AC093591		SOSTDC1
				LINC00621		RYR1
				AP005117		AC009120.1
				AC008764		AC024145.1
				AC013731		FRG1EP
				AP006248		ZNF843
				AL627171		TTC23L
				IL10RA		AC010894.2
				ARHGAP40		AL137847.1
				EPSTI1		AC022211.3
				DGLUCY		AL023583.1
				CFHR5		AC073263.2
				RGS20		MYO1G
				ZNF890P		TTC25
				ADGRF2		FAM225B
				ZNF843		HMGN1P2
				EPGN		AL355472.3
				CYP51A1-AS1		EIF4EBP1P1
				INCA1		AL160286.2
				LINC00634		LINC00908
				RF00019		AC084018.1
				AC020571		AC026471.6
				AC074351		EIF1B-AS1
				COQ10BP2		RASGRP2
				AC091887		SOX6
				AP001767		ADHFE1
				AC022613		RIIAD1
				AC073530		RNU6-476P
				PCNPP1		SYT3
				AF001548		LAT
				MIR3193		FTH1P10
				MIR4512		LINC00853
				AC135048		AP003733.1
				AC009403		AP001351.1
				AC005972		AL162632.3
				SLCO1A2		AC025682.1
				SPATA6L		AC090772.1
				P3H3		AC007684.1
				NPAS1		DACH1
				CDKL2		AC087239.1
				TMEM61		SYNDIG1
				SLC2A2		IL10
				LURAP1		NLRP9
				DDO		DRICH1
				AL359504		MIRLET7D
				RNA5SP44		CNN2P1
				SUPT4H1P1		LINC02015
				BX322234		SCAND3P1
				DBIL5P		AP000842.3
				UBE2FP3		AL035071.2
				RPS15AP11		AP001011.1
				AC006252		AC012213.4
				NUDT19P5		AC108673.2
				U91319		AL139398.1
				AC087749		CSTL1
				AC087289		SLC36A3
				AC007786		NAALADL2-AS1
				CT45A1		AC053503.2
				AC099343		AF129075.1
				AC073073		AC004069.2
				AC007610		AL049776.1
				AC006511		VSIR
				TRPM5		KCNC4
				GPR78		PLGLB2
				OR2W6P		MGARP
				WDFY3-AS2		ANO4
				NT5C1B		GPD1
				PKHD1L1		TRIML2
				SNORA77		DNAH2
				PVALEF		SNORD56B
				CTAGE4		AL138880.1
				AL592114		AGBL5-IT1
				PRELID1P3		TXNP6
				SCARNA18B		RN7SL552P
				SUGT1P3		SMIM15-AS1
				RN7SL23P		AP001922.5
				ENO1P3		LINC01954
				AC114801		AC017083.1
				AC116345		CDH15
				AP002981		POTEF
				AC087257		AC079354.1
				AL390334		CENPCP1
				RN7SL471P		ITGB2-AS1
				AC129926		AC009365.3
				ZNF92P3		AC006483.1
				UNGP3		AC110994.1
				AP000347		AC246785.2
				AL021707		AC105383.1
				AC027682		AC141557.1
				AC009949		CALR3
				AC040160		MUSTN1
				AC007496		AC131212.1
				TRAF3IP3		SYCP2L
				TMEM176B		CPA5
				DPYSL3		AMER2
				OPRL1		AL445665.1
				GNAI1		AC008079.1
				KLRG1		AL121952.1
				TCHH		TNK2-AS1
				TRPV6		HSPA7
				JAM3		DEFB131B
				AC093909		AL606760.1
				PLGLB1		LIMS1-AS1
				EDARADD		RNU7-84P
				MIR103A2		CHKB-CPT1B
				LINC00887		AC008011.2
				AC004980		FSBP
				SSXP10		AP001178.3
				IGBP1-AS2		AC010329.1
				RNA5SP201		AL355802.2
				RN7SKP273		AC005702.3
				RAB28P5		AC012645.4
				GTF2IP7		LINC01451
				AL627308		CHRDL2
				RPL12P11		PLSCR4
				RANP8		COL4A2
				ACBD3-AS1		RGS20
				AC012618		FXYD4
				AC117947		AC007663.1
				AL357060		PRAP1
				PDZRN3-AS1		SV2B
				AC069431		RNA5SP429
				RF00086		C1orf195
				AC156455		AC022868.1
				PRC1-AS1		PGAM1P8
				AL135999		AP002336.3
				ISCA1P4		AC020917.2
				CCDC187		LINC02084
				AC130462		AC009949.1
				AC032044		CYBRD1
				SEPT4-AS1		SNX15
				AC011498		ALDH8A1
				AC233992		HIF3A
				AL139339		AKR7A3
				AC001226		NDST3
				AL359183		JAM3
				AC007342		EVA1C
				TRIM9		AC138969.1
				DOK5		RPL37P1
				AOC3		AC084809.2
				CHRND		LINC01522
				C1RL		NALT1
				ARMC3		RNU7-180P
				LGALS4		RN7SL254P
				FUT2		AC026348.1
				ZNF491		LINC01498
				PNPLA1		RNU6-1045P
				CPSF4L		MKRN3-AS1
				UTS2B		AC091588.1
				RNA5SP491		AC007192.1
				DPF3		ZNF92P3
				NCLP1		AP001160.4
				GPSM3		AL121583.1
				AL360081		AC022021.1
				AL121987		MIR3175
				AL359182		CCL26
				AP001136		NPHS1
				AL590378		LKAAEAR1
				PNKDP1		CLPSL1
				RPSAP13		AC002378.1
				AC007405		HSPE1P27
				AC013268		HNRNPCP1
				SIDT1-AS1		AF186192.3
				AC021086		MIR4701
				AC008906		AC007001.1
				LINC01336		AC005523.1
				SMIM15-AS1		BRI3BPP1
				AC105999		AL008635.1
				AC079296		AP005432.2
				AP003559		AC068790.9
				VASH1-AS1		AC007546.1
				AC005476		SDS
				AC104758		STAB2
				AC026471		C17orf64
				FO680682		TNNI1
				AC024075		CD164L2
				AC010487		HIST1H2AD
				AC139792		AP000911.1
				BX649601		AC012066.1
				AC113385		SLC23A3
				AC048344		AL353771.1
				AL109936		AC108479.1
				FAM189A1		AC106869.1
				ATP4A		RPL12P21
				CPVL		AC091563.1
				C17orf64		AC012186.2
				ZEB1		EML2-AS1
				SLC49A3		AC013472.3
				STK32A		AC114271.1
				FOXD4		AOC1
				CD14		SFRP4
				TMEM86B		ACAN
				RRH		C8orf48
				MTHFD2P7		MRGPRD
				LINC00334		PRKCZ-AS1
				KDM4D		RPL39P5
				MIR27A		MTND4P15
				AL807752		AC073415.1
				AC112512		AL354892.2
				H2AFZP3		AC006042.2
				AL365194		AC117395.1
				PHF2P2		AC008149.1
				AL451042		AC084757.2
				AC141930		AC032011.1
				ZRANB2-AS2		AC110285.6
				ACTG1P14		AC092653.2
				SNAP23P1		CPB2
				LARGE-IT1		CYP2D6
				AC004882		C1RL
				RBPMSLP		SLC28A1
				AL353653		FOXI1
				GFOD1-AS1		CATSPER1
				AC073130		AC105206.1
				UGT1A4		AC100800.1
				STX18-AS1		MIR199A1
				AC055753		TRAV41
				AC106798		PLA2G12AP1
				LINC01337		AC068491.2
				AC100763		RPL7L1P3
				AC090971		AL138760.1
				AC021231		AC073130.1
				AC090907		TM4SF1-AS1
				AC024337		RN7SL846P
				AC021087		AP003555.1
				LINC02170		AC126768.2
				AC127024		AC124067.3
				AP001269		AL442663.3
				AC005070		ISCA1P4
				AC024933		C15orf59-AS1
				LINC02018		MIR151B
				MIR6871		AC092278.1
				MYO16		SLC26A4
				HBQ1		PIK3R2
				ATP8B4		CACNG1
				CCDC88A		SLURP1
				CITED1		IRF8
				IDO1		SLC49A3
				SEMA6D		CCDC185
				KCNMB1		GAS1
				SNX29P1		PRICKLE2-AS3
				SCRG1		AP001619.1
				NCF1C		AL031282.1
				OR7E102P		BMS1P17
				ZNF280A		MACC1-AS1
				PURG		RPL21P40
				CALCB		ITCH-AS1
				MKRN3		AC002401.1
				PSG9		AC078788.2
				MROH2A		AC105918.1
				RF00394		AC119751.2
				LRRC37A5P		AC106872.7
				AC007389		AC136475.2
				AC117402		AC011498.3
				SNORA70F		VN1R80P
				SNORD15A		AC112220.3
				RF00072		AL451064.1
				EVPLL		AC093323.2
				MIR942		AC137936.1
				KRT8P43		GNAI1
				MIR1285-1		NAPSA
				LINC02068		ALPL
				LINC00539		HOXC4
				TLK2P2		AC004540.1
				DDX50P1		RPL17-C18orf32
				AL359095		RNA5SP451
				AC004160		AL513365.1
				AL590133		MRPL23-AS1
				RPL34P6		AC012501.1
				AC092687		AC016999.1
				AC244453		AL450468.1
				MKLN1-AS		AL138895.1
				COX5BP6		MKLN1-AS
				CFAP44-AS1		AC107032.2
				AC022092		AC008915.1
				AP003465		AC092332.1
				OR8G5		KRT18P40
				AL138752		AL049840.5
				AC084824		AC096720.1
				AC107032		AC007128.2
				AL157871		AC007204.1
				SALRNA1		AC012676.4
				AC020687		FRG1DP
				AL390728		NME1-NME2
				AC026470		RASGRF1
				EIF4BP5		MOXD1
				AC007533		RAPSN
				AC005632		SCNN1B
				AC025627		SCN5A
				AC020978		KCNH7
				MIR4644		IFNLR1
				AC005546		NRN1L
				AC005336		AL365223.1
				AC138150		GPSM3
				AC020917		GOLGA2P8
				AC096720		MEG3
				AC112220		SNORA77
				AL024498		KRT18P27
				AL360169		AC078883.1
				AC120349		AC068057.1
				AC117503		LINC02572
				AC073648		EDDM3CP
				IYD		AL513165.1
				NNAT		SCARNA18B
				STAG3		RPS10P16
				SMC1B		GLYCTK-AS1
				MYL7		AC018630.1
				CACNG1		AC089998.3
				TMOD1		AC061975.7
				FLG		SMC2-AS1
				IL34		AL033384.2
				ACSM1		AL049839.2
				CORO6		AC091980.2
				TBX10		AC127002.1
				SPDYE5		AC006449.3
				SLC47A2		AC000123.2
				KCNH7		AL031846.2
				TMEM72		EFNA2
				AC146944		ARG1
				BCO2		KCNK7
				ABCA4		TMEM51-AS1
				MUC2		LCN12
				MIR103A1		CCDC190
				RNA5SP160		BCO2
				SNORD82		RNU6-136P
				C9orf41-AS1		NUTM2D
				TRAV26-2		AP002761.1
				YBX1P4		RPS29P17
				MT1P1		AC138393.2
				RPL18P10		AC013268.3
				RNY1P15		UBOX5-AS1
				AL121990		CD81-AS1
				FO393418		AC136443.3
				AL109797		UBE2CP1
				GTF2IP5		AL033527.3
				TNK2-AS1		MIR4713
				DHRS4L1		AL354892.3
				Z99127		MRPL37P1
				BIRC6-AS1		AC010980.2
				RPL22P24		LINC01415
				AL354892		AL355512.1
				AL137186		AC004816.2
				CICP27		AL359762.1
				AC106869		CDKL2
				PHBP13		SSTR5
				ZNRF3-IT1		RNA5SP370
				OR2I1P		RN7SKP217
				AL627309		RNU6-142P
				RPS2P25		AC021016.1
				RPS12P31		AL139081.1
				LINC00882		RPL39P6
				PSMC1P7		AC123768.2
				RPS17P11		AC019163.1
				AC009720		RNU6-548P
				LINC02362		AC078852.2
				AC010307		AL442663.2
				HOXA10		AL133153.2
				HOXA-AS3		AC009962.1
				AC010768		LINC02170
				UBE2CP1		AC016722.3
				IDH2-DT		AL121753.1
				CSPG4P11		AC114947.2
				AC095057		AP005230.1
				AC004158		CYP4F35P
				AC046158		AC087289.1
				LINC02256		AC007681.1
				AC079414		AC007496.3
				AC108134		AC032044.2
				MIR4522		CDH7
				AC145207		PTGS1
				AP001020		LIX1
				AP001542		DMP1
				AP005131		CCDC148
				AC016590		LDHC
				AC090589		C8orf74
				HINT1P2		EXD1
				AC011891		MPPED1
				ARF4-AS1		CYP51A1-AS1
				AL008721		CYS1
				AL117339		RNA5SP122
				C1QTNF3-AMACR		AC069213.1
				MIR6505		AC098828.2
				AC005840		CTAGE4
				AL390726		DDX50P1
				TEX54		AL360091.1
				OR8B3		HOXB-AS1
				CYP46A1		LINC01517
				LINC01587		AL355916.1
				SYNDIG1		RPS20P31
				MCF2		AC080013.2
				RARRES2		AC011406.1
				WNT6		AC021106.1
				C1orf54		AC097467.3
				ALDH1A2		LINC02475
				PDE6A		AC119751.6
				CCDC146		RRM1-AS1
				SHF		RSF1-IT1
				RCN3		AC022613.1
				JPH2		AC120498.1
				CYGB		AL592424.1
				FGF19		AC093249.4
				INPP5D		AC010761.4
				S100G		AC010624.3
				FADS6		AC090589.3
				VWC2L		AC008738.6
				LINC00843		AC009948.4
				RFLNA		AL513477.2
				EXD1		AC129492.6
				LCN12		AC135048.3
				LRRC70		AC012409.2
				PABPC1L2A		MIR6783
				MESP2		MYO16
				LRRIQ4		ZNF423
				CERKL		PLVAP
				APOD		SYT6
				CYP2F1		FBXO43
				RNU6-137P		ZFHX2-AS1
				RNU6-784P		STPG2
				SLC25A14P1		TRPV6
				GNAT3		SYNPO2L
				RPL7P29		CNGA2
				MIR1276		MIR504
				PSMB11		TRBV10-1
				RNU2-52P		OR6X1
				AC092427		AC010886.1
				LINC00937		AL353572.1
				LINC00362		DNMBP-AS1
				AC096649		HCG20
				RPL36P2		AL604028.2
				WASF5P		AL356968.2
				FTH1P1		AL606807.1
				CYP51A1P2		AC004951.2
				AC078777		LINC02477
				Z82246		AC005544.1
				AL162430		AC002398.1
				AL357079		AC024075.1
				GAPDHP39		HOMER3-AS1
				AL096701		AC005387.2
				RN7SL338P		AL118558.4
				RN7SL306P		MIR6776
				BGLAP		AC009318.3
				AC094085		AC110048.2
				SCARF2		AP003108.5
				RN7SL623P		AL031432.4
				NADK2-AS1		HAL
				OCIAD1-AS1		JPH2
				RNF103-CHMP3		LGI2
				XBP1P1		BNC1
				AC026124		NPTX1
				AC017037		ARL10
				AC112206		LRRN4CL
				SELENOP		MTHFD2P7
				AC145285		ARF1P2
				AL356488		EEF1A1P8
				AC022973		TEX26-AS1
				PPIAP41		FTOP1
				AC007848		CYP4F26P
				AC009509		UQCRBP2
				AC005832		UQCRHP1
				AL355075		AL031772.1
				AC004817		AC074351.1
				AL442663		GAPDHP65
				AL109628		AL161727.1
				AC105129		AC104389.4
				AC018904		RPL7P24
				AC010287		ERVW-1
				AC100821		FOXP1-AS1
				AL512274		AC074254.1
				AC007493		AC027279.1
				AC233699		AP001178.1
				AC040162		AC005899.5
				AC016866		AC025171.5
				AC103810		AC009570.1
				RPL9P29		AC004264.2
				AF038458		DUX4L37
				AC025857		MINDY4
				AL096865		PIK3C2G
				AL031775		KLRG1
				STAG3L5P-PVRIG2P-PILRB		FITM1
				AL391834		RCN3
				AL359532		CNBD2
				AL645608		NAP1L3
				AL138689		AC010969.1
				AC092119		MIR320E
				AL109804		AC010168.1
				AC253576		AL589655.1
				AL442125		CLCN3P1
				AC010271		AL671986.1
				AC026748		AL355994.2
				AC016251		RPS6P12
				AC092574		AC067956.1
				IPCEF1		AL357079.1
				CDH7		AL627309.5
				EFNA2		LINC01470
				CRYM		AC010260.1
				VIPR2		RNU4-54P
				MPL		AC233699.1
				CTCFL		RN7SL850P
				SHBG		AC023158.2
				ANGPTL3		AL121829.2
				SDS		AL359183.1
				PIANP		AC120349.3
				COL2A1		AC011815.3
				HAPLN3		NAALAD2
				MEP1B		SLC2A9
				CBLC		HOXA7
				LYZL2		SPSB3
				ALLC		OTOGL
				FGD5		ENTPD3
				PGLYRP2		HCG4
				RRAD		SLITRK1
				MUC3A		FAM43B
				DES		HS6ST1P1
				ZNF575		SPANXC
				EFCAB5		CALM2P3
				ZC3H12D		FAM229A
				GPAT2		RPL15P14
				WNK3		AL157400.2
				HOXC4		DCUN1D2-AS
				NTRK1		AC079760.1
				SNORA31		AC245884.3
				RN7SKP95		LINC01661
				RNU6-944P		AC006252.1
				PSORS1C1		ATP5MF-PTCD1
				AC010624		AC093214.1
				RNU6-260P		AC084117.1
				MIR128-1		DNAAF4
				TRAV39		AC115102.1
				FTH1P3		CRTC3-AS1
				CAPN14		AC120498.6
				CCNB2P1		LINC00621
				RPL18AP14		LINC01543
				AL049795		UBE2CP2
				SLC44A3-AS1		LONRF2P1
				AL356417		AL583832.1
				AC007182		AL161729.4
				AC023590		TH
				AC084809		SEMA3G
				USF1P1		ANGPTL3
				CYP4F26P		SEMA6D
				AC010894		SHF
				PHBP16		PPP2R2B
				AC131571		HSFX1
				SEPT7-AS1		MST1P2
				AC022400		AC092118.1
				AL160175		OVCH1
				AL590428		PLA2G4E
				AF131215		SLC34A3
				RPS2P32		RNU6-1280P
				JTBP1		SYT15
				AC002076		LINC00634
				AL020993		RNU6-1165P
				AC010149		SLC44A3-AS1
				SHANK2-AS2		AC022022.1
				KRT18P5		AL390067.1
				AL365318		DUTP1
				AC104389		AC010733.1
				TM4SF1-AS1		GAS6-AS1
				KRTAP5-8		OR2AF1P
				CBX5P1		AL034550.1
				AC110769		RNU7-125P
				AL390195		AC017037.2
				LINC02453		AC005740.3
				LINC02101		OR8G5
				CICP16		AL390334.1
				SRD5A3-AS1		AC022558.1
				AC098798		AC109460.3
				PITPNM2-AS1		RN7SL246P
				RNU7-3P		AC016590.2
				LINC01605		AC010463.3
				AC107909		AC097358.2
				AC091563		AC106028.5
				AP001107		Z82244.2
				AP002807		SEZ6
				DNAAF4		FGF4
				AP000462		CTTNBP2
				ATP5MFP4		ATP8B4
				AC012555		GAPDHS
				AC009779		HGFAC
				AL355102		BVES
				AL359232		MPL
				AL157687		ARHGAP40
				AC005096		TOX2
				AC023034		CD70
				AP000842		TUBB2B
				HSPB9		CTF1
				AC112484		LRRC71
				AC016245		LMOD1
				AC015727		SSTR2
				MIR4698		PLAC9
				AC129510		RNU6-509P
				MIR3178		RNA5SP160
				AC005786		FAM83A-AS1
				EML2-AS1		LINC01460
				BNIP3P26		AL354702.1
				AC026691		HCG14
				AL133467		AL357552.2
				AC025766		TNKS2-AS1
				AC004890		LINC00574
				AL445222		DUXAP7
				AL390719		UFL1-AS1
				AL596325		RF01210
				AP001065		MIR1972-2
				AC023509		RN7SL20P
				CU633906		AC083798.1
				AC022306		PCP4L1
				AC243571		AC092436.2
				AL354696		GRPEL2-AS1
				AC009464		AP001372.4
				AC091060		AC006064.3
				Z69720		AC009486.1
				AC093330		AP005117.1
				AC136603		SNRPGP4
				AL592430		AC107952.2
				PEG13		RIMBP3
				RHOXF1P3		MIR6133
				AP005212		AL353662.3
				AP000553		AC010653.3
				AC091185		AC021066.2
